# Supplementary material for: Are Primary Outcomes Really Primary? An Exploratory Cross-Sectional Nationwide Web-Based Survey Study for Outcomes Reflecting Real Symptoms and Needs of Patients with Lumbar Disc Herniation
Source: MDPI journal article supplement (doi:10.3390/healthcare11182598), 2023-09-21
Supplement: s1 [file s1]

Table S3. Types of disability due to lumbar disc herniation according to sex and age. (For patients diagnosed on MRI)

|                   | Total       | Sex                |                    |                 | Age (years)       |                   |                   |                   |                   |                  |
|-------------------|-------------|--------------------|--------------------|-----------------|-------------------|-------------------|-------------------|-------------------|-------------------|------------------|
|                   |             | Male               | Female             | <i>P</i> -value | 19-29             | 30-39             | 40-49             | 50-59             | ≥60               | <i>P</i> -value  |
| Personal care     | 116 (36.6%) | 58 (33.7%)         | 58 (40.0%)         | 0.299           | 16 (28.1%)        | 20 (33.9%)        | 25 (36.8%)        | 32 (45.7%)        | 23 (36.5%)        | 0.345            |
| Lifting           | 212 (66.9%) | 113 (65.7%)        | 99 (68.3%)         | 0.714           | 30 (52.6%)        | 41 (69.5%)        | 46 (67.6%)        | 50 (71.4%)        | 45 (71.4%)        | 0.155            |
| Walking           | 140 (44.2%) | 67 (39.0%)         | 73 (50.3%)         | 0.055           | <b>19 (33.3%)</b> | <b>18 (30.5%)</b> | <b>27 (39.7%)</b> | <b>34 (48.6%)</b> | <b>42 (66.7%)</b> | <b>&lt;0.001</b> |
| Sitting           | 210 (66.2%) | <b>102 (59.3%)</b> | <b>108 (74.5%)</b> | <b>0.006</b>    | 42 (73.7%)        | 39 (66.1%)        | 42 (61.8%)        | 47 (67.1%)        | 40 (63.5%)        | 0.688            |
| Standing          | 150 (47.3%) | <b>71 (41.3%)</b>  | <b>79 (54.5%)</b>  | <b>0.026</b>    | 21 (36.8%)        | 28 (47.5%)        | 34 (50.0%)        | 34 (48.6%)        | 33 (52.4%)        | 0.494            |
| Sleeping          | 137 (43.2%) | <b>61 (35.5%)</b>  | <b>76 (52.4%)</b>  | <b>0.003</b>    | 26 (45.6%)        | 30 (50.8%)        | 23 (33.8%)        | 34 (48.6%)        | 24 (38.1%)        | 0.242            |
| Traveling         | 147 (46.4%) | 85 (49.4%)         | 62 (42.8%)         | 0.284           | <b>18 (31.6%)</b> | <b>23 (39.0%)</b> | <b>44 (64.7%)</b> | <b>31 (44.3%)</b> | <b>31 (49.2%)</b> | <b>0.003</b>     |
| Social life       | 89 (28.1%)  | 46 (26.7%)         | 43 (29.7%)         | 0.653           | 13 (22.8%)        | 14 (23.7%)        | 19 (27.9%)        | 24 (34.3%)        | 19 (30.2%)        | 0.59             |
| Psychological     | 70 (22.1%)  | 34 (19.8%)         | 36 (24.8%)         | 0.344           | <b>6 (10.5%)</b>  | <b>9 (15.3%)</b>  | <b>15 (22.1%)</b> | <b>20 (28.6%)</b> | <b>20 (31.7%)</b> | <b>0.025</b>     |
| Productivity loss | 110 (34.7%) | <b>70 (40.7%)</b>  | <b>40 (27.6%)</b>  | <b>0.02</b>     | 15 (26.3%)        | 22 (37.3%)        | 23 (33.8%)        | 29 (41.4%)        | 21 (33.3%)        | 0.491            |
| Gastro-internal   | 48 (15.1%)  | <b>16 ( 9.3%)</b>  | <b>32 (22.1%)</b>  | <b>0.003</b>    | <b>5 ( 8.8%)</b>  | <b>4 ( 6.8%)</b>  | <b>6 ( 8.8%)</b>  | <b>15 (21.4%)</b> | <b>18 (28.6%)</b> | <b>0.001</b>     |
| Others            | 5 ( 1.6%)   | 3 ( 1.7%)          | 2 ( 1.4%)          | <b>1.000</b>    | <b>4 ( 7.0%)</b>  | <b>0 ( 0.0%)</b>  | <b>0 ( 0.0%)</b>  | <b>0 ( 0.0%)</b>  | <b>1 ( 1.6%)</b>  | <b>0.003</b>     |
