# Supplementary material for: Are Primary Outcomes Really Primary? An Exploratory Cross-Sectional Nationwide Web-Based Survey Study for Outcomes Reflecting Real Symptoms and Needs of Patients with Lumbar Disc Herniation
Source: MDPI journal article supplement (doi:10.3390/healthcare11182598), 2023-09-21
Supplement: s1 [file s1]

Table S10. Age and sex distribution of respondents reporting satisfactory improvement as more than 80% by type of disability

|                          | Total      | Sex        |            |         | Age (years) |           |            |           |            |         |
|--------------------------|------------|------------|------------|---------|-------------|-----------|------------|-----------|------------|---------|
|                          |            | Male       | Female     | P-value | 19-29       | 30-39     | 40-49      | 50-59     | ≥60        | P-value |
| Personal care (N=79)     | 65 (82.3)  | 29 (78.4)  | 36 (85.7)  | 0.578   | 11 (91.7)   | 13 (81.2) | 12 (85.7)  | 16 (72.7) | 13 (86.7)  | 0.748   |
| Lifting (N=103)          | 85 (82.5)  | 47 (82.46) | 38 (82.61) | 1.000   | 14 (93.3)   | 30 (88.2) | 17 (73.9)  | 9 (64.3)  | 15 (88.2)  | 0.177   |
| Walking (N=96)           | 83 (86.5)  | 33 (84.6)  | 50 (87.7)  | 0.894   | 11 (100.0)  | 14 (87.5) | 21 (95.5)  | 13 (76.5) | 24 (80.0)  | 0.231   |
| Sitting (N=184)          | 158 (85.9) | 64 (82.1)  | 94 (88.7)  | 0.289   | 47 (88.7)   | 33 (91.7) | 29 (78.4)  | 22 (78.6) | 27 (90.0)  | 0.338   |
| Standing (N=82)          | 73 (89.0)  | 32 (94.1)  | 41 (85.4)  | 0.294   | 22 (91.7)   | 11 (91.7) | 11 (91.7)  | 13 (76.5) | 16 (94.1)  | 0.584   |
| Sleep (N=106)            | 97 (91.5)  | 41 (87.2)  | 56 (94.9)  | 0.181   | 25 (89.3)   | 20 (95.2) | 20 (95.2)  | 14 (77.8) | 18 (100.0) | 0.188   |
| Travelling (N=72)        | 65 (90.3)  | 45 (90.0)  | 20 (90.9)  | 1.000   | 7 (87.5)    | 10 (90.9) | 19 (90.5)  | 15 (88.2) | 14 (93.3)  | 1.000   |
| Social life (N=29)       | 23 (79.3)  | 14 (77.8)  | 9 (81.8)   | 1.000   | 3 (75.0)    | 4 (100.0) | 6 (75.0)   | 4 (57.1)  | 6 (100.0)  | 0.331   |
| Psychological (N=27)     | 20 (74.1)  | 13 (81.2)  | 7 (63.6)   | 0.391   | 1 (33.3)    | 6 (100.0) | 5 (100.0)  | 4 (57.1)  | 4 (66.7)   | 0.093   |
| Productivity loss (N=67) | 58 (86.6)  | 42 (84.0)  | 16 (94.1)  | 0.430   | 7 (87.5)    | 16 (84.2) | 10 (100.0) | 16 (84.2) | 9 (81.8)   | 0.818   |
| Gastrointestinal (N=19)  | 13 (68.4)  | 8 (80.0)   | 5 (55.6)   | 0.350   | 1 (33.3)    | 0 (0.0)   | 0 (0.0)    | 5 (83.3)  | 7 (87.5)   | 0.056   |
| Others (N=8)             | 6 (75.0)   | 3 (100.0)  | 3 (60.0)   | 0.464   | 4 (100.0)   | -         | 2 (100.0)  | 0 (0.0)   | 0 (0.0)    | 0.071   |
