# Supplementary material for: Are Primary Outcomes Really Primary? An Exploratory Cross-Sectional Nationwide Web-Based Survey Study for Outcomes Reflecting Real Symptoms and Needs of Patients with Lumbar Disc Herniation
Source: MDPI journal article supplement (doi:10.3390/healthcare11182598), 2023-09-21
Supplement: s1 [file s1]

Table S4. Numeric rating scale scores for each symptom by respondent characteristics

|                         | Back pain | Pelvic pain | Radiating leg pain | Numbness in the leg | Weakness in the leg | Tingling in the leg |
|-------------------------|-----------|-------------|--------------------|---------------------|---------------------|---------------------|
| Total                   | 5.7 ± 2.2 | 5.6 ± 2.4   | 5.6 ± 2.5          | 5.0 ± 2.5           | 5.1 ± 2.5           | 4.7 ± 2.7           |
| Sex                     |           |             |                    |                     |                     |                     |
| Male                    | 5.5 ± 2.3 | 5.6 ± 2.4   | 5.6 ± 2.3          | 4.9 ± 2.5           | 5.2 ± 2.3           | 4.7 ± 2.5           |
| Female                  | 5.8 ± 2.1 | 5.5 ± 2.4   | 5.6 ± 2.6          | 5.1 ± 2.4           | 5.0 ± 2.8           | 4.8 ± 2.9           |
| <i>P</i> -value         | 0.111     | 0.808       | 0.901              | 0.288               | 0.650               | 0.808               |
| Age, years              |           |             |                    |                     |                     |                     |
| 19-29                   | 5.2 ± 2.2 | 5.4 ± 2.4   | 5.2 ± 2.7          | 4.6 ± 2.4           | 4.4 ± 2.8           | 4.1 ± 2.9           |
| 30-39                   | 5.4 ± 2.3 | 5.3 ± 2.5   | 5.6 ± 2.3          | 4.5 ± 2.6           | 4.2 ± 2.9           | 3.9 ± 2.6           |
| 40-49                   | 5.3 ± 2.2 | 5.1 ± 2.4   | 4.5 ± 2.6          | 4.8 ± 2.2           | 5.1 ± 2.1           | 4.9 ± 2.5           |
| 50-59                   | 6.2 ± 2.1 | 5.9 ± 2.3   | 6.5 ± 2.2          | 5.5 ± 2.6           | 5.6 ± 1.9           | 5.3 ± 2.5           |
| ≥60                     | 6.2 ± 2.3 | 6.1 ± 2.4   | 5.8 ± 2.1          | 5.5 ± 2.5           | 6.1 ± 2.4           | 5.0 ± 2.8           |
| <i>P</i> -value         | 0.002     | 0.185       | 0.008              | 0.008               | 0.057               | 0.197               |
| Symptom onset time      |           |             |                    |                     |                     |                     |
| <4 weeks                | 5.6 ± 2.1 | 5.6 ± 2.3   | 5.7 ± 2.3          | 5.0 ± 2.4           | 6.1 ± 2.5           | 4.1 ± 2.5           |
| ≥4 weeks to <12 weeks   | 5.9 ± 2.1 | 5.9 ± 2.3   | 5.8 ± 2.2          | 5.0 ± 2.4           | 4.6 ± 2.3           | 4.8 ± 2.7           |
| ≥12 weeks to <12 months | 5.3 ± 2.3 | 5.1 ± 2.6   | 5.4 ± 2.5          | 4.9 ± 2.4           | 5.3 ± 1.9           | 5.6 ± 2.3           |
| ≥12 months              | 5.7 ± 2.3 | 5.5 ± 2.5   | 5.6 ± 2.6          | 5.0 ± 2.6           | 5.2 ± 2.8           | 4.5 ± 2.8           |
| <i>P</i> -value         | 0.360     | 0.435       | 0.865              | 0.981               | 0.316               | 0.282               |
| Severity                |           |             |                    |                     |                     |                     |
| Severe                  | 7.8 ± 1.5 | 7.7 ± 1.5   | 5.6 ± 2.5          | 7.2 ± 2.0           | 6.5 ± 2.4           | 6.3 ± 2.5           |
| Moderate to severe      | 5.9 ± 1.2 | 5.6 ± 1.4   | 5.7 ± 1.4          | 5.3 ± 1.6           | 5.1 ± 1.5           | 4.6 ± 2.1           |
| Mild to moderate        | 3.3 ± 1.4 | 2.8 ± 1.6   | 2.7 ± 1.4          | 2.7 ± 1.5           | 2.8 ± 1.6           | 2.4 ± 1.4           |
| <i>P</i> -value         | <0.001    | <0.001      | <0.001             | <0.001              | <0.001              | <0.001              |

Symptom severity is defined according to the NRS score as follows: ≥8, severe; 6–7, moderate to severe; ≤5, mild to moderate.
