# Supplementary material for: Are Primary Outcomes Really Primary? An Exploratory Cross-Sectional Nationwide Web-Based Survey Study for Outcomes Reflecting Real Symptoms and Needs of Patients with Lumbar Disc Herniation
Source: MDPI journal article supplement (doi:10.3390/healthcare11182598), 2023-09-21
Supplement: s1 [file s1]

Table S7. Respondent-defined decrease in NRS score for satisfactory improvement. (For patients diagnosed on MRI)

|                                | Back pain | Pelvic pain | Radiating leg pain | Numbness in the leg | Weakness in the leg | Tingling in the leg |
|--------------------------------|-----------|-------------|--------------------|---------------------|---------------------|---------------------|
| <b>Total (N=317)</b>           | 3.2 ± 2.3 | 3.5 ± 2.4   | 3.0 ± 2.3          | 2.7 ± 2.4           | 2.4 ± 2.2           | 3.2 ± 2.5           |
| <b>Sex</b>                     |           |             |                    |                     |                     |                     |
| Male (n=172)                   | 2.9 ± 2.3 | 3.3 ± 2.4   | 2.8 ± 2.3          | 2.3 ± 2.0           | 2.7 ± 2.3           | 3.2 ± 2.9           |
| Female (n=145)                 | 3.5 ± 2.2 | 3.6 ± 2.4   | 3.1 ± 2.2          | 3.3 ± 2.8           | 2.0 ± 2.1           | 3.2 ± 1.9           |
| <i>P</i> -value                | 0.041     | 0.608       | 0.591              | 0.027               | 0.508               | 0.967               |
| <b>Age group, years</b>        |           |             |                    |                     |                     |                     |
| 19-29 (n=57)                   | 3.1 ± 2.1 | 4.3 ± 2.2   | 3.0 ± 2.9          | 2.6 ± 2.4           | 2.4 ± 1.9           | 3.0 ± 2.6           |
| 30-39 (n=59)                   | 3.2 ± 2.4 | 3.6 ± 2.9   | 4.1 ± 2.4          | 2.8 ± 2.2           | 1.5 ± 1.7           | 4.3 ± 3.4           |
| 40-49 (n=68)                   | 3.1 ± 2.3 | 3.1 ± 2.4   | 2.8 ± 2.4          | 2.6 ± 2.2           | 2.3 ± 2.5           | 3.0 ± 2.3           |
| 50-59 (n=70)                   | 3.0 ± 2.2 | 3.8 ± 2.2   | 2.9 ± 2.0          | 2.8 ± 2.6           | 2.8 ± 3.1           | 3.1 ± 2.5           |
| ≥60 (n=63)                     | 3.3 ± 2.5 | 3.0 ± 2.3   | 1.9 ± 1.5          | 2.9 ± 2.5           | 3.0 ± 2.8           | 2.0 ± 1.2           |
| <i>P</i> -value                | 0.987     | 0.505       | 0.188              | 0.964               | 0.913               | 0.711               |
| <b>Symptom onset time</b>      |           |             |                    |                     |                     |                     |
| <4 weeks (n=31)                | 2.7 ± 2.4 | 3.3 ± 2.9   | 1.6 ± 2.1          | 3.3 ± 3.1           | 0.7 ± 0.6           | 3.0 ± 1.4           |
| ≥4 weeks to <12 weeks (n=66)   | 2.4 ± 2.1 | 2.6 ± 2.0   | 3.5 ± 2.0          | 2.5 ± 1.9           | 1.6 ± 2.5           | 4.0 ± 2.7           |
| ≥12 weeks to <12 months (n=58) | 2.6 ± 2.0 | 4.4 ± 2.5   | 3.0 ± 1.4          | 2.2 ± 2.3           | 2.0 ± 0.0           | 2.8 ± 2.2           |
| ≥12 months (n=162)             | 3.7 ± 2.3 | 3.5 ± 2.4   | 3.0 ± 2.5          | 3.0 ± 2.4           | 3.2 ± 2.3           | 3.2 ± 2.9           |
| <i>P</i> -value                | 0.004     | 0.174       | 0.337              | 0.342               | 0.236               | 0.869               |
| <b>Severity</b>                |           |             |                    |                     |                     |                     |
| Severe (n=113)                 | 3.9 ± 2.7 | 4.6 ± 2.5   | 3.8 ± 2.5          | 4.0 ± 2.9           | 3.0 ± 2.6           | 3.8 ± 3.0           |
| Moderate to severe (n=105)     | 3.2 ± 2.0 | 3.2 ± 1.9   | 3.0 ± 2.0          | 2.5 ± 2.0           | 3.2 ± 2.5           | 3.4 ± 2.4           |
| Mild to moderate (n=99)        | 2.2 ± 1.5 | 1.6 ± 1.5   | 1.5 ± 1.3          | 1.8 ± 1.4           | 1.2 ± 0.9           | 1.9 ± 0.7           |
| <i>P</i> -value                | <0.001    | <0.001      | 0.004              | <0.001              | 0.179               | 0.254               |
