# Supplementary material for: Are Primary Outcomes Really Primary? An Exploratory Cross-Sectional Nationwide Web-Based Survey Study for Outcomes Reflecting Real Symptoms and Needs of Patients with Lumbar Disc Herniation
Source: MDPI journal article supplement (doi:10.3390/healthcare11182598), 2023-09-21
Supplement: s1 [file s1]

Table S1. Symptom distribution by basic respondent characteristics. (For patients diagnosed on MRI)

|                                | <b>Back pain</b> | <b>Pelvic pain</b> | <b>Radiating leg pain</b> | <b>Numbness in the leg</b> | <b>Weakness in the leg</b> | <b>Tingling in the leg</b> |
|--------------------------------|------------------|--------------------|---------------------------|----------------------------|----------------------------|----------------------------|
|                                | N(%)             | N(%)               | N(%)                      | N(%)                       | N(%)                       | N(%)                       |
| <b>Total (n=317)</b>           | 262 (82.6%)      | 171 (53.9%)        | 128 (40.4%)               | 275 (86.8%)                | 79 (24.9%)                 | 107 (33.8%)                |
| <b>Sex</b>                     |                  |                    |                           |                            |                            |                            |
| Male (n=172)                   | 139 (80.8%)      | 85 (49.4%)         | 65 (37.8%)                | 149 (86.6%)                | 49 (28.5%)                 | 67 (39.0%)                 |
| Female (n=145)                 | 123 (84.8%)      | 86 (59.3%)         | 63 (43.4%)                | 126 (86.9%)                | 30 (20.7%)                 | 40 (27.6%)                 |
| <i>P</i> -value                | 0.429            | 0.100              | 0.364                     | 1.000                      | 0.142                      | 0.044                      |
| <b>Age group, years</b>        |                  |                    |                           |                            |                            |                            |
| 19-29 (n=57)                   | 47 (82.5%)       | 26 (45.6%)         | 15 (26.3%)                | 50 (87.7%)                 | 17 (29.8%)                 | 15 (26.3%)                 |
| 30-39 (n=59)                   | 52 (88.1%)       | 38 (64.4%)         | 25 (42.4%)                | 54 (91.5%)                 | 13 (22.0%)                 | 20 (33.9%)                 |
| 40-49 (n=68)                   | 59 (86.8%)       | 32 (47.1%)         | 25 (36.8%)                | 60 (88.2%)                 | 12 (17.6%)                 | 23 (33.8%)                 |
| 50-59 (n=70)                   | 53 (75.7%)       | 38 (54.3%)         | 36 (51.4%)                | 56 (80.0%)                 | 18 (25.7%)                 | 24 (34.3%)                 |
| ≥60 (n=63)                     | 51 (81.0%)       | 37 (58.7%)         | 27 (42.9%)                | 55 (87.3%)                 | 19 (30.2%)                 | 25 (39.7%)                 |
| <i>P</i> -value                | 0.341            | 0.194              | 0.065                     | 0.387                      | 0.425                      | 0.661                      |
| <b>Symptom onset time</b>      |                  |                    |                           |                            |                            |                            |
| <4 weeks (n=31)                | 25 (80.7%)       | 19 (61.3%)         | 13 (41.9%)                | 27 (87.1%)                 | 10 (32.3%)                 | 7 (22.6%)                  |
| ≥4 to <12 weeks (n=66)         | 54 (81.8%)       | 41 (62.1%)         | 31 (47.0%)                | 59 (89.4%)                 | 19 (28.8%)                 | 27 (20.8%)                 |
| ≥12 weeks to <12 months (n=58) | 48 (82.8%)       | 26 (44.8%)         | 18 (31.0%)                | 52 (89.7%)                 | 9 (15.5%)                  | 15 (25.9%)                 |
| ≥12 months (n=162)             | 135 (83.3%)      | 85 (52.5%)         | 66 (40.7%)                | 137 (84.6%)                | 41 (25.3%)                 | 58 (35.8%)                 |
| <i>P</i> -value                | 0.982            | 0.210              | 0.343                     | 0.682                      | 0.243                      | 0.160                      |
| <b>Severity</b>                |                  |                    |                           |                            |                            |                            |
| Severe (n=113)                 | 99 (87.6%)       | 75 (66.4%)         | 59 (52.2%)                | 99 (87.6%)                 | 44 (38.9%)                 | 54 (47.8%)                 |
| Moderate to severe (n=105)     | 89 (84.8%)       | 58 (55.2%)         | 41 (39.0%)                | 97 (92.4%)                 | 19 (18.1%)                 | 27 (25.7%)                 |
| Mild to moderate (n=99)        | 74 (74.7%)       | 38 (38.4%)         | 28 (28.3%)                | 79 (79.8%)                 | 16 (16.2%)                 | 26 (26.3%)                 |
| <i>P</i> -value                | 0.037            | <0.001             | 0.002                     | 0.028                      | <0.001                     | <0.001                     |

All percentage values were calculated with the N in each row as the denominator.
