# Supplementary material for: Are Primary Outcomes Really Primary? An Exploratory Cross-Sectional Nationwide Web-Based Survey Study for Outcomes Reflecting Real Symptoms and Needs of Patients with Lumbar Disc Herniation
Source: MDPI journal article supplement (doi:10.3390/healthcare11182598), 2023-09-21
Supplement: s1 [file s1]

Table S13. Factors that influence on important factors patients consider in treatment. (For patients diagnosed on MRI)

|                                              | Disability rather pain |         | Stable effects rather rapid effects |         | Safety rather treatment effects |         |
|----------------------------------------------|------------------------|---------|-------------------------------------|---------|---------------------------------|---------|
|                                              | OR                     | P value | OR                                  | P value | OR                              | P value |
| <b>Sex (ref=Male)</b>                        |                        |         |                                     |         |                                 |         |
| Female (n=145)                               | 0.64 (0.40-1.01)       | 0.054   | 0.74 (0.41-1.32)                    | 0.302   | 1.41 (0.89-2.24)                | 0.143   |
| <b>Age group, years (ref=19-29)</b>          |                        |         |                                     |         |                                 |         |
| 30-39 (n=59)                                 | 1.47 (0.69-3.12)       | 0.32    | 1.15 (0.43-3.09)                    | 0.785   | 1.02 (0.47-2.19)                | 0.966   |
| 40-49 (n=68)                                 | 1.02 (0.49-2.15)       | 0.95    | 0.74 (0.29-1.87)                    | 0.521   | 1.13 (0.53-2.41)                | 0.75    |
| 50-59 (n=70)                                 | 1.41 (0.68-2.92)       | 0.359   | 1.08 (0.42-2.79)                    | 0.876   | 0.66 (0.32-1.38)                | 0.271   |
| ≥60 (n=63)                                   | 0.89 (0.42-1.87)       | 0.751   | 0.89 (0.33-2.37)                    | 0.812   | 0.94 (0.44- 2.02)               | 0.876   |
| <b>Symptom onset time (ref= &lt;4 weeks)</b> |                        |         |                                     |         |                                 |         |
| ≥4 weeks to <12 weeks (n=116)                | 0.95 (0.39-2.29)       | 0.906   | 0.50 (0.16- 1.55)                   | 0.233   | 2.75 (1.11-6.85)                | 0.03    |
| ≥12 weeks to <12 months (n=98)               | 2.18 (0.86-5.54)       | 0.1     | 0.63 (0.19- 2.01)                   | 0.431   | 2.64 (1.03-6.75)                | 0.043   |
| ≥12 months (n=227)                           | 1.10 (0.50-2.41)       | 0.82    | 1.26 (0.43-3.71)                    | 0.672   | 3.05 (1.34-6.97)                | 0.008   |
| <b>Severity (ref=mild to moderate)</b>       |                        |         |                                     |         |                                 |         |
| Severe (n=147)                               | 0.85 (0.48-1.50)       | 0.569   | 0.87 (0.42-1.81)                    | 0.718   | 1.43 (0.79-2.56)                | 0.234   |
| Moderate to severe (n=178)                   | 1.23 (0.70-2.18)       | 0.475   | 1.05 (0.51-2.19)                    | 0.888   | 0.81 (0.46-1.43)                | 0.468   |
| <b>AUC</b>                                   | 0.62                   |         | 0.64                                |         | 0.62                            |         |
