# Supplementary material for: Are Primary Outcomes Really Primary? An Exploratory Cross-Sectional Nationwide Web-Based Survey Study for Outcomes Reflecting Real Symptoms and Needs of Patients with Lumbar Disc Herniation
Source: MDPI journal article supplement (doi:10.3390/healthcare11182598), 2023-09-21
Supplement: s1 [file s1]

Table S8. Priority disabilities for improvement

|                      | Total      | Sex       |            |                 | Age (years) |           |           |           |                |                 |
|----------------------|------------|-----------|------------|-----------------|-------------|-----------|-----------|-----------|----------------|-----------------|
|                      |            | Male      | Female     | <i>P</i> -value | 19-29       | 30-39     | 40-49     | 50-59     | 60≤            | <i>P</i> -value |
| <b>Total (N=500)</b> |            | 253       | 247        |                 | 100         | 100       | 100       | 100       | 100            |                 |
| Personal care        | 79 (15.8)  | 37 (14.6) | 42 (17.0)  | 0.544           | 12 (12.0)   | 16 (16.0) | 14 (14.0) | 22 (22.0) | 15 (15.0)      | 0.371           |
| Lifting              | 103 (20.6) | 57 (22.5) | 46 (18.6)  | 0.332           | 15 (15.0)   | 34 (34.0) | 23 (23.0) | 14 (14.0) | 17 (17.0)      | 0.002           |
| Walking              | 96 (19.2)  | 39 (15.4) | 57 (23.1)  | <b>0.039</b>    | 11 (11.0)   | 16 (16.0) | 22 (22.0) | 17 (17.0) | 30 (30.0)      | 0.010           |
| Sitting              | 184 (36.8) | 78 (30.8) | 106 (42.9) | <b>0.007</b>    | 53 (53.0)   | 36 (36.0) | 37 (37.0) | 28 (28.0) | 30 (30.0)      | 0.002           |
| Standing             | 82 (16.4)  | 34 (13.4) | 48 (19.4)  | <b>0.091</b>    | 24 (24.0)   | 12 (12.0) | 12 (12.0) | 17 (17.0) | 17 (17.0)      | 0.131           |
| Sleeping             | 106 (21.2) | 47 (18.6) | 59 (23.9)  | 0.179           | 28 (28.0)   | 21 (21.0) | 21 (21.0) | 18 (18.0) | 18 (18.0)      | 0.406           |
| Traveling            | 72 (14.4)  | 50 (19.8) | 22 (8.9)   | <b>0.001</b>    | 8 (8.0)     | 11 (11.0) | 21 (21.0) | 17 (17.0) | 15 (15.0)      | 0.079           |
| Social life          | 29 (5.8)   | 18 (7.1)  | 11 (4.5)   | 0.279           | 4 (4.0)     | 4 (4.0)   | 8 (8.0)   | 7 (7.0)   | 6 (6.0)        | 0.673           |
| Anxiety/Depression   | 27 (5.4)   | 16 (6.3)  | 11 (4.5)   | 0.467           | 3 (3.0)     | 6 (6.0)   | 5 (5.0)   | 7 (7.0)   | 6 (6.0)        | 0.772           |
| Productivity loss    | 67 (13.4)  | 50 (19.8) | 17 (6.9)   | <0.001          | 8 (8.0)     | 19 (19.0) | 10 (10.0) | 19 (19.0) | 11 (11.0)      | 0.052           |
| Gastrointestinal     | 19 (3.8)   | 10 (4.0)  | 9 (3.6)    | 1.000           | 3 (3.0)     | 1 (1.0)   | 1 (1.0)   | 6 (6.0)   | <b>8 (8.0)</b> | 0.03            |
| Others               | 8 (1.6)    | 3 (1.2)   | 5 (2.0)    | 0.500           | 4 (4.0)     | 0 (0.0)   | 2 (2.0)   | 1 (1.0)   | 1 (1.0)        | 0.293           |

All values are represented with frequency and percentage.
