# Supplementary material for: Are Primary Outcomes Really Primary? An Exploratory Cross-Sectional Nationwide Web-Based Survey Study for Outcomes Reflecting Real Symptoms and Needs of Patients with Lumbar Disc Herniation
Source: MDPI journal article supplement (doi:10.3390/healthcare11182598), 2023-09-21
Supplement: s1 [file s1]

Table S6. Priority symptoms for improvement by respondent characteristics. (For patients diagnosed on MRI)

|                                | <b>Back pain</b> | <b>Pelvic pain</b> | <b>Radiating leg pain</b> | <b>Numbness in the leg</b> | <b>Weakness in the leg</b> | <b>Tingling in the leg</b> |
|--------------------------------|------------------|--------------------|---------------------------|----------------------------|----------------------------|----------------------------|
|                                | N (%)            | N (%)              | N (%)                     | N (%)                      | N (%)                      | N (%)                      |
| <b>Total (N=317)</b>           | 194 (61.2%)      | 98 (30.9%)         | 67 (21.1%)                | 144 (45.4%)                | 25 ( 7.9%)                 | 34 (10.7%)                 |
| <b>Sex</b>                     |                  |                    |                           |                            |                            |                            |
| Male (n=172)                   | 105 (61.0%)      | 44 (25.6%)         | 36 (20.9%)                | 81 (47.1%)                 | 16 ( 9.3%)                 | 22 (12.8%)                 |
| Female (n=145)                 | 89 (61.4%)       | 54 (37.2%)         | 31 (21.4%)                | 63 (43.4%)                 | 9 ( 6.2%)                  | 12 ( 8.3%)                 |
| <i>P</i> -value                | 1.000            | 0.034              | 1.000                     | 0.592                      | 0.418                      | 0.266                      |
| <b>Age group, years</b>        |                  |                    |                           |                            |                            |                            |
| 19-29 (n=57)                   | 39 (68.4%)       | 14 (24.6%)         | 9 (15.8%)                 | 24 (42.1%)                 | 7 (12.3%)                  | 3 ( 5.3%)                  |
| 30-39 (n=59)                   | 39 (66.1%)       | 18 (30.5%)         | 15 (25.4%)                | 25 (42.4%)                 | 4 ( 6.8%)                  | 7 (11.9%)                  |
| 40-49 (n=68)                   | 46 (67.6%)       | 20 (29.4%)         | 12 (17.6%)                | 34 (50.0%)                 | 3 ( 4.4%)                  | 10 (14.7%)                 |
| 50-59 (n=70)                   | 38 (54.3%)       | 20 (28.6%)         | 18 (25.7%)                | 33 (47.1%)                 | 5 ( 7.1%)                  | 10 (14.3%)                 |
| ≥60 (n=63)                     | 32 (50.8%)       | 26 (41.3%)         | 13 (20.6%)                | 28 (44.4%)                 | 6 ( 9.5%)                  | 4 ( 6.3%)                  |
| <i>P</i> -value                | 0.120            | 0.343              | 0.555                     | 0.885                      | 0.564                      | 0.270                      |
| <b>Symptom onset time</b>      |                  |                    |                           |                            |                            |                            |
| <4 weeks (n=31)                | 18 (58.1%)       | 6 (19.4%)          | 7 (22.6%)                 | 17 (54.8%)                 | 3 (9.7%)                   | 2 (6.5%)                   |
| ≥4 weeks to <12 weeks (n=66)   | 42 (63.6%)       | 19 (28.8%)         | 17 (25.8%)                | 30 (45.5%)                 | 7 (10.6%)                  | 7 (10.6%)                  |
| ≥12 weeks to <12 months (n=58) | 37 (63.8%)       | 17 (29.3%)         | 8 (13.8%)                 | 30 (51.7%)                 | 2 (3.5%)                   | 10 (17.2%)                 |
| ≥12 months (n=162)             | 97 (59.9%)       | 56 (34.6%)         | 35 (21.6%)                | 67 (41.4%)                 | 13 (8.0%)                  | 15 (9.3%)                  |
| <i>P</i> -value                | 0.902            | 0.367              | 0.427                     | 0.374                      | 0.458                      | 0.317                      |
| <b>Severity</b>                |                  |                    |                           |                            |                            |                            |
| Severe (n=113)                 | 69 (61.1%)       | 43 (38.1%)         | 28 (24.8%)                | 46 (40.7%)                 | 10 ( 8.8%)                 | 16 (14.2%)                 |
| Moderate to severe (n=105)     | 68 (64.8%)       | 35 (33.3%)         | 22 (21.0%)                | 49 (46.7%)                 | 6 ( 5.7%)                  | 9 ( 8.6%)                  |
| Mild to moderate (n=99)        | 57 (57.6%)       | 20 (20.2%)         | 17 (17.2%)                | 49 (49.5%)                 | 9 ( 9.1%)                  | 9 ( 9.1%)                  |
| <i>P</i> -value                | 0.574            | 0.016              | 0.399                     | 0.419                      | 0.599                      | 0.337                      |

All percentage values were calculated with the n in each row as the denominator.

Symptom severity is defined according to the NRS score as follows: ≥8, severe; 6-7, moderate to severe; ≤5, mild to moderate.
