# Supplementary material for: Are Primary Outcomes Really Primary? An Exploratory Cross-Sectional Nationwide Web-Based Survey Study for Outcomes Reflecting Real Symptoms and Needs of Patients with Lumbar Disc Herniation
Source: MDPI journal article supplement (doi:10.3390/healthcare11182598), 2023-09-21
Supplement: s1 [file s1]

**Table S14.** Unmet medical needs and desire for treatment

|                                                      | Total      | Sex        |            |                 | Age (years) |           |           |           |           |                 |
|------------------------------------------------------|------------|------------|------------|-----------------|-------------|-----------|-----------|-----------|-----------|-----------------|
|                                                      |            | Male       | Female     | <i>P</i> -value | 19-29       | 30-39     | 40-49     | 50-59     | 60≤       | <i>P</i> -value |
| <b>Sufficient care</b>                               |            |            |            |                 |             |           |           |           |           |                 |
| Yes                                                  | 268 (53.6) | 143 (56.5) | 125 (50.6) | 0.185           | 50 (50.0)   | 52 (52.0) | 60 (60.0) | 52 (52.0) | 54 (54.0) | 0.67            |
| No                                                   | 232 (46.4) | 110 (43.5) | 122 (49.4) |                 | 50 (50.0)   | 48 (48.0) | 40 (40.0) | 48 (48.0) | 46 (46.0) |                 |
| <b>Reasons for unmet medical needs (N=232)</b>       |            | 110        | 122        |                 | 50          | 48        | 40        | 48        | 46        |                 |
| Unsatisfactory effect                                | 112 (48.3) | 55 (50.0)  | 57 (46.7)  | 0.713           | 15 (30.0)   | 21 (43.8) | 20 (50.0) | 27 (56.2) | 29 (63.0) | 0.02            |
| Cost                                                 | 152 (65.5) | 71 (64.5)  | 81 (66.4)  | 0.875           | 35 (70.0)   | 37 (77.1) | 25 (62.5) | 30 (62.5) | 25 (54.3) | 0.19            |
| Time                                                 | 158 (68.1) | 74 (67.3)  | 84 (68.9)  | 0.907           | 34 (68.0)   | 36 (75.0) | 33 (82.5) | 35 (72.9) | 20 (43.5) | 0.001           |
| Accessibility                                        | 60 (25.9)  | 31 (28.2)  | 29 (23.8)  | 0.538           | 16 (32.0)   | 9 (18.8)  | 11 (27.5) | 16 (33.3) | 8 (17.4)  | 0.25            |
| Physician does not take the symptom seriously        | 36 (15.5)  | 22 (20.0)  | 14 (11.5)  | 0.108           | 6 (12.0)    | 5 (10.4)  | 6 (15.0)  | 7 (14.6)  | 12 (26.1) | 0.25            |
| Others                                               | 1 (0.4)    | 1 (0.9)    | 0 (0.0)    | 0.474           | 0 (0.0)     | 0 (0.0)   | 0 (0.0)   | 0 (0.0)   | 1 (2.2)   | 0.37            |
| <b>Desire for treatment</b>                          |            |            |            |                 |             |           |           |           |           |                 |
| No treatment is needed when symptoms improve         | 194 (38.8) | 79 (31.2)  | 115 (46.6) | 0.001           | 53 (53.0)   | 42 (42.0) | 32 (32.0) | 36 (36.0) | 31 (31.0) | 0.01            |
| Treatment should be continued even after improvement | 306 (61.2) | 174 (68.8) | 132 (53.4) |                 | 47 (47.0)   | 58 (58.0) | 68 (68.0) | 64 (64.0) | 69 (69.0) |                 |
| <b>Desire for treatment (Frequency)</b>              |            |            |            |                 |             |           |           |           |           |                 |
| 4 times or more per week                             | 43 (8.6)   | 27 (10.7)  | 16 (6.5)   | 0.411           | 13 (13.0)   | 9 (9.0)   | 4 (4.0)   | 10 (10.0) | 7 (7.0)   | 0.06            |
| 2–3 times per week                                   | 232 (46.4) | 114 (45.1) | 118 (47.8) |                 | 46 (46.0)   | 39 (39.0) | 52 (52.0) | 50 (50.0) | 45 (45.0) |                 |
| Once a week                                          | 157 (31.4) | 79 (31.2)  | 78 (31.6)  |                 | 27 (27.0)   | 32 (32.0) | 34 (34.0) | 35 (35.0) | 29 (29.0) |                 |
| Two times or less per month                          | 68 (13.6)  | 33 (13.0)  | 35 (14.2)  |                 | 14 (14.0)   | 20 (20.0) | 10 (10.0) | 5 (5.0)   | 19 (19.0) |                 |
| <b>Desire for treatment (Duration per session)</b>   |            |            |            |                 |             |           |           |           |           |                 |
| Less than 1 hour                                     | 391 (78.2) | 193 (76.3) | 198 (80.2) | 0.153           | 82 (82.0)   | 73 (73.0) | 76 (76.0) | 82 (82.0) | 78 (78.0) | 0.15            |

|                       |            |           |           |  |           |           |           |           |           |  |
|-----------------------|------------|-----------|-----------|--|-----------|-----------|-----------|-----------|-----------|--|
| Between 1 and 2 hours | 102 (20.4) | 54 (21.3) | 48 (19.4) |  | 17 (17.0) | 23 (23.0) | 22 (22.0) | 18 (18.0) | 22 (22.0) |  |
| 2 hours or longer     | 7 (1.4)    | 6 (2.4)   | 1 (0.4)   |  | 1 (1.0)   | 4 (4.0)   | 2 (2.0)   | 0 (0.0)   | 0 (0.0)   |  |
