# Supplementary material for: Are Primary Outcomes Really Primary? An Exploratory Cross-Sectional Nationwide Web-Based Survey Study for Outcomes Reflecting Real Symptoms and Needs of Patients with Lumbar Disc Herniation
Source: MDPI journal article supplement (doi:10.3390/healthcare11182598), 2023-09-21
Supplement: s1 [file s1]

Table S9. Priority disabilities for improvement. (For patients diagnosed on MRI)

|                      | Total       | Sex               |                   |                  | Age (years)       |                   |                   |                   |                   |                 |
|----------------------|-------------|-------------------|-------------------|------------------|-------------------|-------------------|-------------------|-------------------|-------------------|-----------------|
|                      |             | Male              | Female            | <i>P</i> -value  | 19-29             | 30-39             | 40-49             | 50-59             | 60≤               | <i>P</i> -value |
| <b>Total (N=317)</b> |             | 172               | 145               |                  | 57                | 59                | 68                | 70                | 63                |                 |
| Personal care        | 48 (15.1%)  | 23 (13.4%)        | 25 (17.2%)        | 0.424            | 7 (12.3%)         | 7 (11.9%)         | 10 (14.7%)        | 15 (21.4%)        | 9 (14.3%)         | 0.549           |
| Lifting              | 68 (21.5%)  | 38 (22.1%)        | 30 (20.7%)        | 0.868            | 8 (14.0%)         | <b>20 (33.9%)</b> | 18 (26.5%)        | 13 (18.6%)        | 9 (14.3%)         | <b>0.032</b>    |
| Walking              | 55 (17.4%)  | <b>22 (12.8%)</b> | <b>33 (22.8%)</b> | <b>0.029</b>     | 3 (5.3%)          | 6 (10.2%)         | 13 (19.1%)        | 12 (17.1%)        | <b>21 (33.3%)</b> | <b>0.001</b>    |
| Sitting              | 120 (37.9%) | <b>55 (32.0%)</b> | <b>65 (44.8%)</b> | <b>0.025</b>     | <b>28 (49.1%)</b> | <b>26 (44.1%)</b> | <b>26 (38.2%)</b> | <b>21 (30.0%)</b> | <b>19 (30.2%)</b> | 0.113           |
| Standing             | 44 (13.9%)  | 22 (12.8%)        | 22 (15.2%)        | 0.654            | 11 (19.3%)        | 5 (8.5%)          | 8 (11.8%)         | 11 (15.7%)        | 9 (14.3%)         | 0.509           |
| Sleeping             | 69 (21.8%)  | 32 (18.6%)        | 37 (25.5%)        | 0.177            | 19 (33.3%)        | 14 (23.7%)        | 10 (14.7%)        | 13 (18.6%)        | 13 (20.6%)        | 0.132           |
| Traveling            | 53 (16.7%)  | <b>37 (21.5%)</b> | <b>16 (11.0%)</b> | <b>0.019</b>     | 4 (7.0%)          | 9 (15.3%)         | <b>18 (26.5%)</b> | 12 (17.1%)        | 10 (15.9%)        | 0.071           |
| Social life          | 21 (6.6%)   | 13 (7.6%)         | 8 (5.5%)          | 0.616            | 3 (5.3%)          | 4 (6.8%)          | 5 (7.4%)          | 5 (7.1%)          | 4 (6.3%)          | 0.994           |
| Anxiety/Depression   | 21 (6.6%)   | 13 (7.6%)         | 8 (5.5%)          | 0.616            | 2 (3.5%)          | 5 (8.5%)          | 4 (5.9%)          | 6 (8.6%)          | 4 (6.3%)          | 0.8             |
| Productivity loss    | 46 (14.5%)  | <b>37 (21.5%)</b> | <b>9 (6.2%)</b>   | <b>&lt;0.001</b> | 6 (10.5%)         | 10 (16.9%)        | 7 (10.3%)         | 14 (20.0%)        | 9 (14.3%)         | 0.45            |
| Gastrointestinal     | 15 (4.7%)   | 6 (3.5%)          | 9 (6.2%)          | 0.384            | 2 (3.5%)          | 1 (1.7%)          | 1 (1.5%)          | 5 (7.1%)          | 6 (9.5%)          | 0.15            |
| Others               | 5 (1.6%)    | 3 (1.7%)          | 2 (1.4%)          | 1                | 4 (7.0%)          | 0 (0.0%)          | 0 (0.0%)          | 0 (0.0%)          | 1 (1.6%)          | 0.003           |

All values are represented with frequency and percentage.
