# Supplementary material for: Are Primary Outcomes Really Primary? An Exploratory Cross-Sectional Nationwide Web-Based Survey Study for Outcomes Reflecting Real Symptoms and Needs of Patients with Lumbar Disc Herniation
Source: MDPI journal article supplement (doi:10.3390/healthcare11182598), 2023-09-21
Supplement: s1 [file s1]

Table S12. Factors that influence on important factors patients consider in treatment

| Disability rather pain                      |                  |         | Stable effects rather rapid effects |         | Safety rather treatment effects |         |
|---------------------------------------------|------------------|---------|-------------------------------------|---------|---------------------------------|---------|
|                                             | OR               | P value | OR                                  | P value | OR                              | P value |
| <b>Sex (ref=Male)</b>                       |                  |         |                                     |         |                                 |         |
| Female (n=247)                              | 0.65 (0.46-0.94) | 0.021   | 0.95 (0.62-1.47)                    | 0.820   | 1.45 (1.01-2.09)                | 0.042   |
| <b>Age group, years (ref=19-29)</b>         |                  |         |                                     |         |                                 |         |
| 30-39 (n=100)                               | 1.68 (0.95-2.97) | 0.089   | 0.93 (0.48-1.80)                    | 0.835   | 1.03 (0.58-1.81)                | 0.932   |
| 40-49 (n=100)                               | 1.52 (0.85-2.72) | 0.089   | 0.80 (0.41-1.56)                    | 0.510   | 1.31 (0.73-2.37)                | 0.363   |
| 50-59 (n=100)                               | 1.53 (0.86-2.71) | 0.120   | 1.44 (0.71-2.93)                    | 0.314   | 0.86 (0.48-1.53)                | 0.606   |
| ≥60 (n=100)                                 | 1.24 (0.70-2.21) | 0.572   | 1.33 (0.65-2.73)                    | 0.430   | 1.03 (0.58-1.84)                | 0.920   |
| <b>Symptom onset time (ref=&lt;4 weeks)</b> |                  |         |                                     |         |                                 |         |
| ≥4 weeks to <12 weeks (n=116)               | 0.73 (0.38-1.39) | 0.526   | 1.48 (0.74-2.95)                    | 0.270   | 1.99 (1.04-3.80)                | 0.038   |
| ≥12 weeks to <12 months (n=98)              | 1.47 (0.74-2.93) | 0.153   | 1.89 (0.90-3.97)                    | 0.092   | 1.77 (0.90-3.48)                | 0.097   |
| ≥12 months (n=227)                          | 0.86 (0.48-1.55) | 0.718   | 2.57 (1.33-4.96)                    | 0.005   | 2.37 (1.30-4.30)                | 0.005   |
| <b>Severity (ref=mild to moderate)</b>      |                  |         |                                     |         |                                 |         |
| Severe (n=147)                              | 1.11 (0.72-1.72) | 0.886   | 0.94 (0.56-1.58)                    | 0.829   | 0.86 (0.55-1.33)                | 0.491   |
| Moderate to severe (n=178)                  | 1.15 (0.73-1.82) | 0.681   | 0.99 (0.57-1.72)                    | 0.970   | 0.64 (0.40-1.01)                | 0.054   |
| <b>AUC</b>                                  | 0.61             |         | 0.62                                |         | 0.61                            |         |
