# Supplementary material for: Are Primary Outcomes Really Primary? An Exploratory Cross-Sectional Nationwide Web-Based Survey Study for Outcomes Reflecting Real Symptoms and Needs of Patients with Lumbar Disc Herniation
Source: MDPI journal article supplement (doi:10.3390/healthcare11182598), 2023-09-21
Supplement: s1 [file s1]

Table S5. Severity of disability according to sex and age

|                              | Total      | Sex       |           | Age (years) |           |           |           |           |
|------------------------------|------------|-----------|-----------|-------------|-----------|-----------|-----------|-----------|
|                              |            | Male      | Female    | 19-29       | 30-39     | 40-49     | 50-59     | 60≤       |
| <b>Personal care (N=176)</b> |            | 82        | 94        | 28          | 38        | 32        | 46        | 32        |
| 1                            | 100 (56.8) | 37 (45.1) | 63 (67.0) | 21 (75.0)   | 26 (68.4) | 15 (46.9) | 20 (43.5) | 18 (56.2) |
| 2                            | 53 (30.1)  | 33 (40.2) | 20 (21.3) | 7 (25.0)    | 8 (21.1)  | 10 (31.2) | 18 (39.1) | 10 (31.2) |
| 3                            | 14 (8.0)   | 9 (11.0)  | 5 (5.3)   | 0 (0.0)     | 4 (10.5)  | 5 (15.6)  | 4 (8.7)   | 1 (3.1)   |
| 4                            | 1 (0.6)    | 0 (0.0)   | 1 (1.1)   | 0 (0.0)     | 0 (0.0)   | 0 (0.0)   | 1 (2.2)   | 0 (0.0)   |
| 5                            | 8 (4.5)    | 3 (3.7)   | 5 (5.3)   | 0 (0.0)     | 0 (0.0)   | 2 (6.2)   | 3 (6.5)   | 3 (9.4)   |
| <i>P</i> -value              |            | 0.012     |           | 0.159       |           |           |           |           |
| <b>Lifting (N=318)</b>       |            | 159       | 159       | 50          | 66        | 65        | 69        | 68        |
| 1                            | 128 (40.3) | 74 (46.5) | 54 (34.0) | 33 (66.0)   | 34 (51.5) | 25 (38.5) | 22 (31.9) | 14 (20.6) |
| 2                            | 61 (19.2)  | 33 (20.8) | 28 (17.6) | 8 (16.0)    | 11 (16.7) | 15 (23.1) | 16 (23.2) | 11 (16.2) |
| 3                            | 80 (25.2)  | 29 (18.2) | 51 (32.1) | 6 (12.0)    | 13 (19.7) | 16 (24.6) | 19 (27.5) | 26 (38.2) |
| 4                            | 39 (12.3)  | 19 (11.9) | 20 (12.6) | 3 (6.0)     | 7 (10.6)  | 6 (9.2)   | 9 (13.0)  | 14 (20.6) |
| 5                            | 10 (3.1)   | 4 (2.5)   | 6 (3.8)   | 0 (0.0)     | 1 (1.5)   | 3 (4.6)   | 3 (4.3)   | 3 (4.4)   |
| <i>P</i> -value              |            | 0.040     |           | 0.001       |           |           |           |           |
| <b>Walking (N=215)</b>       |            | 93        | 122       | 37          | 34        | 39        | 46        | 59        |
| 1                            | 167 (77.7) | 73 (78.5) | 94 (77.0) | 30 (81.1)   | 29 (85.3) | 31 (79.5) | 29 (63.0) | 48 (81.4) |
| 2                            | 19 (8.8)   | 9 (9.7)   | 10 (8.2)  | 5 (13.5)    | 0 (0.0)   | 4 (10.3)  | 5 (10.9)  | 5 (8.5)   |
| 3                            | 19 (8.8)   | 7 (7.5)   | 12 (9.8)  | 1 (2.7)     | 4 (11.8)  | 2 (5.1)   | 8 (17.4)  | 4 (6.8)   |
| 4                            | 1 (0.5)    | 0 (0.0)   | 1 (0.8)   | 0 (0.0)     | 1 (2.9)   | 0 (0.0)   | 0 (0.0)   | 0 (0.0)   |
| 5                            | 9 (4.2)    | 4 (4.3)   | 5 (4.1)   | 1 (2.7)     | 0 (0.0)   | 2 (5.1)   | 4 (8.7)   | 2 (3.4)   |
| <i>P</i> -value              |            | 0.966     |           | 0.131       |           |           |           |           |
| <b>Sitting (N=323)</b>       |            | 148       | 175       | 74          | 63        | 59        | 66        | 61        |
| 1                            | 136 (42.1) | 60 (40.5) | 76 (43.4) | 45 (60.8)   | 32 (50.8) | 20 (33.9) | 17 (25.8) | 22 (36.1) |
| 2                            | 117 (36.2) | 56 (37.8) | 61 (34.9) | 18 (24.3)   | 22 (34.9) | 30 (50.8) | 25 (37.9) | 22 (36.1) |

|                            |            |           |           |           |           |           |           |           |
|----------------------------|------------|-----------|-----------|-----------|-----------|-----------|-----------|-----------|
| 3                          | 52 (16.1)  | 24 (16.2) | 28 (16.0) | 9 (12.2)  | 7 (11.1)  | 5 (8.5)   | 19 (28.8) | 12 (19.7) |
| 4                          | 13 (4.0)   | 5 (3.4)   | 8 (4.6)   | 1 (1.4)   | 2 (3.2)   | 3 (5.1)   | 4 (6.1)   | 3 (4.9)   |
| 5                          | 5 (1.5)    | 3 (2.0)   | 2 (1.1)   | 1 (1.4)   | 0 (0.0)   | 1 (1.7)   | 1 (1.5)   | 2 (3.3)   |
| <i>P</i> -value            |            | 0.906     |           | 0.004     |           |           |           |           |
| <b>Standing (N=226)</b>    |            | 98        | 128       | 41        | 46        | 46        | 47        | 46        |
| 1                          | 129 (57.1) | 53 (54.1) | 76 (59.4) | 30 (73.2) | 29 (63.0) | 22 (47.8) | 22 (46.8) | 26 (56.5) |
| 2                          | 43 (19.0)  | 25 (25.5) | 18 (14.1) | 7 (17.1)  | 9 (19.6)  | 13 (28.3) | 8 (17.0)  | 6 (13.0)  |
| 3                          | 38 (16.8)  | 13 (13.3) | 25 (19.5) | 3 (7.3)   | 7 (15.2)  | 8 (17.4)  | 11 (23.4) | 9 (19.6)  |
| 4                          | 14 (6.2)   | 7 (7.1)   | 7 (5.5)   | 1 (2.4)   | 1 (2.2)   | 2 (4.3)   | 6 (12.8)  | 4 (8.7)   |
| 5                          | 2 (0.9)    | 0 (0.0)   | 2 (1.6)   | 0 (0.0)   | 0 (0.0)   | 1 (2.2)   | 0 (0.0)   | 1 (2.2)   |
| <i>P</i> -value            |            | 0.126     |           | 0.228     |           |           |           |           |
| <b>Sleeping (N=204)</b>    |            | 86        | 118       | 43        | 45        | 36        | 45        | 35        |
| 1                          | 115 (56.4) | 48 (55.8) | 67 (56.8) | 31 (72.1) | 33 (73.3) | 20 (55.6) | 18 (40.0) | 13 (37.1) |
| 2                          | 37 (18.1)  | 13 (15.1) | 24 (20.3) | 7 (16.3)  | 5 (11.1)  | 8 (22.2)  | 7 (15.6)  | 10 (28.6) |
| 3                          | 32 (15.7)  | 16 (18.6) | 16 (13.6) | 5 (11.6)  | 4 (8.9)   | 4 (11.1)  | 11 (24.4) | 8 (22.9)  |
| 4                          | 19 (9.3)   | 9 (10.5)  | 10 (8.5)  | 0 (0.0)   | 3 (6.7)   | 3 (8.3)   | 9 (20.0)  | 4 (11.4)  |
| 5                          | 1 (0.5)    | 0 (0.0)   | 1 (0.8)   | 0 (0.0)   | 0 (0.0)   | 1 (2.8)   | 0 (0.0)   | 0 (0.0)   |
| <i>P</i> -value            |            | 0.681     |           | 0.005     |           |           |           |           |
| <b>Traveling (N=210)</b>   |            | 115       | 95        | 32        | 37        | 54        | 45        | 42        |
| 1                          | 88 (41.9)  | 56 (48.7) | 32 (33.7) | 14 (43.8) | 17 (45.9) | 26 (48.1) | 13 (28.9) | 18 (42.9) |
| 2                          | 73 (34.8)  | 39 (33.9) | 34 (35.8) | 14 (43.8) | 13 (35.1) | 18 (33.3) | 15 (33.3) | 13 (31.0) |
| 3                          | 37 (17.6)  | 16 (13.9) | 21 (22.1) | 3 (9.4)   | 6 (16.2)  | 6 (11.1)  | 12 (26.7) | 10 (23.8) |
| 4                          | 2 (1.0)    | 1 (0.9)   | 1 (1.1)   | 1 (3.1)   | 0 (0.0)   | 0 (0.0)   | 1 (2.2)   | 0 (0.0)   |
| 5                          | 10 (4.8)   | 3 (2.6)   | 7 (7.4)   | 0 (0.0)   | 1 (2.7)   | 4 (7.4)   | 4 (8.9)   | 1 (2.4)   |
| <i>P</i> -value            |            | 0.091     |           | 0.353     |           |           |           |           |
| <b>Social life (N=119)</b> |            | 60        | 59        | 15        | 19        | 24        | 35        | 26        |
| 1                          | 41 (34.5)  | 18 (30.0) | 23 (39.0) | 8 (53.3)  | 9 (47.4)  | 6 (25.0)  | 10 (28.6) | 8 (30.8)  |

|                                         |           |           |           |          |           |           |           |           |
|-----------------------------------------|-----------|-----------|-----------|----------|-----------|-----------|-----------|-----------|
| 2                                       | 48 (40.3) | 28 (46.7) | 20 (33.9) | 2 (13.3) | 7 (36.8)  | 14 (58.3) | 13 (37.1) | 12 (46.2) |
| 3                                       | 20 (16.8) | 11 (18.3) | 9 (15.3)  | 3 (20.0) | 3 (15.8)  | 0 (0.0)   | 8 (22.9)  | 6 (23.1)  |
| 4                                       | 5 (4.2)   | 2 (3.3)   | 3 (5.1)   | 1 (6.7)  | 0 (0.0)   | 2 (8.3)   | 2 (5.7)   | 0 (0.0)   |
| 5                                       | 5 (4.2)   | 1 (1.7)   | 4 (6.8)   | 1 (6.7)  | 0 (0.0)   | 2 (8.3)   | 2 (5.7)   | 0 (0.0)   |
| <i>P</i> -value                         |           | 0.396     |           | 0.186    |           |           |           |           |
| <b>Anxiety/depression (N=92)</b>        |           | 44        | 48        | 7        | 12        | 18        | 24        | 31        |
| 1                                       | 3 (3.3)   | 0 (0.0)   | 3 (6.2)   | 1 (14.3) | 0 (0.0)   | 0 (0.0)   | 2 (8.3)   | 0 (0.0)   |
| 2                                       | 43 (46.7) | 22 (50.0) | 21 (43.8) | 3 (42.9) | 5 (41.7)  | 9 (50.0)  | 10 (41.7) | 16 (51.6) |
| 3                                       | 36 (39.1) | 18 (40.9) | 18 (37.5) | 1 (14.3) | 5 (41.7)  | 7 (38.9)  | 11 (45.8) | 12 (38.7) |
| 4                                       | 10 (10.9) | 4 (9.1)   | 6 (12.5)  | 2 (28.6) | 2 (16.7)  | 2 (11.1)  | 1 (4.2)   | 3 (9.7)   |
| 5                                       | -         | -         | -         | -        | -         | -         | -         | -         |
| <i>P</i> -value                         |           | 0.441     |           | 0.473    |           |           |           |           |
| <b>Productivity loss (N=146)</b>        |           | 89        | 57        | 18       | 33        | 29        | 40        | 26        |
| 1                                       | 64 (43.8) | 38 (42.7) | 26 (45.6) | 7 (38.9) | 15 (45.5) | 18 (62.1) | 18 (45.0) | 6 (23.1)  |
| 2                                       | 39 (26.7) | 26 (29.2) | 13 (22.8) | 6 (33.3) | 10 (30.3) | 5 (17.2)  | 11 (27.5) | 7 (26.9)  |
| 3                                       | 22 (15.1) | 13 (14.6) | 9 (15.8)  | 5 (27.8) | 5 (15.2)  | 3 (10.3)  | 3 (7.5)   | 6 (23.1)  |
| 4                                       | 9 (6.2)   | 5 (5.6)   | 4 (7.0)   | 0 (0.0)  | 1 (3.0)   | 1 (3.4)   | 5 (12.5)  | 2 (7.7)   |
| 5                                       | 12 (8.2)  | 7 (7.9)   | 5 (8.8)   | 0 (0.0)  | 2 (6.1)   | 2 (6.9)   | 3 (7.5)   | 5 (19.2)  |
| <i>P</i> -value                         |           | 0.935     |           | 0.161    |           |           |           |           |
| <b>Gastrointestinal problems (N=62)</b> |           | 24        | 38        | 8        | 6         | 8         | 18        | 22        |
| 1                                       | 8 (12.9)  | 2 (8.3)   | 6 (15.8)  | 1 (12.5) | 0 (0.0)   | 1 (12.5)  | 2 (11.1)  | 4 (18.2)  |
| 2                                       | 24 (38.7) | 9 (37.5)  | 15 (39.5) | 3 (37.5) | 3 (50.0)  | 5 (62.5)  | 7 (38.9)  | 6 (27.3)  |
| 3                                       | 22 (35.5) | 11 (45.8) | 11 (28.9) | 2 (25.0) | 3 (50.0)  | 1 (12.5)  | 6 (33.3)  | 10 (45.5) |
| 4                                       | 8 (12.9)  | 2 (8.3)   | 6 (15.8)  | 2 (25.0) | 0 (0.0)   | 1 (12.5)  | 3 (16.7)  | 2 (9.1)   |
| 5                                       | -         | -         | -         | -        | -         | -         | -         | -         |
| <i>P</i> -value                         |           | 0.541     |           | 0.819    |           |           |           |           |

Differences according to age were analyzed using the chi-square test with the simulated *P*-value calculated using the Monte Carlo method.
