# Supplementary material for: Are Primary Outcomes Really Primary? An Exploratory Cross-Sectional Nationwide Web-Based Survey Study for Outcomes Reflecting Real Symptoms and Needs of Patients with Lumbar Disc Herniation
Source: MDPI journal article supplement (doi:10.3390/healthcare11182598), 2023-09-21
Supplement: s1 [file s1]

Table S2. Types of disability due to lumbar disc herniation according to sex and age

|                   | Total      | Sex        |            |                 | Age (years) |           |           |           |           |                 |
|-------------------|------------|------------|------------|-----------------|-------------|-----------|-----------|-----------|-----------|-----------------|
|                   |            | Male       | Female     | <i>P</i> -value | 19-29       | 30-39     | 40-49     | 50-59     | ≥60       | <i>P</i> -value |
| Personal care     | 176 (35.2) | 82 (32.4)  | 94 (38.1)  | 0.219           | 28 (28.0)   | 38 (38.0) | 32 (32.0) | 46 (46.0) | 32 (32.0) | 0.071           |
| Lifting           | 318 (63.6) | 159 (62.8) | 159 (64.4) | 0.794           | 50 (50.0)   | 66 (66.0) | 65 (65.0) | 69 (69.0) | 68 (68.0) | 0.034           |
| Walking           | 215 (43.0) | 93 (36.8)  | 122 (49.4) | 0.006           | 37 (37.0)   | 34 (34.0) | 39 (39.0) | 46 (46.0) | 59 (59.0) | 0.003           |
| Sitting           | 323 (64.6) | 148 (58.5) | 175 (70.9) | 0.005           | 74 (74.0)   | 63 (63.0) | 59 (59.0) | 66 (66.0) | 61 (61.0) | 0.199           |
| Standing          | 226 (45.2) | 98 (38.7)  | 128 (51.8) | 0.004           | 41 (41.0)   | 46 (46.0) | 46 (46.0) | 47 (47.0) | 46 (46.0) | 0.922           |
| Sleeping          | 204 (40.8) | 86 (34.0)  | 118 (47.8) | 0.002           | 43 (43.0)   | 45 (45.0) | 36 (36.0) | 45 (45.0) | 35 (35.0) | 0.405           |
| Traveling         | 210 (42.0) | 115 (45.5) | 95 (38.5)  | 0.135           | 32 (32.0)   | 37 (37.0) | 54 (54.0) | 45 (45.0) | 42 (42.0) | 0.022           |
| Social life       | 119 (23.8) | 60 (23.7)  | 59 (23.9)  | 1.000           | 15 (15.0)   | 19 (19.0) | 24 (24.0) | 35 (35.0) | 26 (26.0) | 0.013           |
| Psychological     | 92 (18.4)  | 44 (17.4)  | 48 (19.4)  | 0.636           | 7 (7.0)     | 12 (12.0) | 18 (18.0) | 24 (24.0) | 31 (31.0) | <0.001          |
| Productivity loss | 146 (29.2) | 89 (35.2)  | 57 (23.1)  | 0.004           | 18 (18.0)   | 33 (33.0) | 29 (29.0) | 40 (40.0) | 26 (26.0) | 0.012           |
| Gastro-internal   | 62 (12.4)  | 24 (9.5)   | 38 (15.4)  | 0.062           | 8 (8.0)     | 6 (6.0)   | 8 (8.0)   | 18 (18.0) | 22 (22.0) | 0.001           |
| Others            | 9 (1.8)    | 3 (1.2)    | 6 (2.4)    | 0.334           | 4 (4.0)     | 1 (1.0)   | 2 (2.0)   | 1 (1.0)   | 1 (1.0)   | 0.572           |
