# Supplementary material for: Are Primary Outcomes Really Primary? An Exploratory Cross-Sectional Nationwide Web-Based Survey Study for Outcomes Reflecting Real Symptoms and Needs of Patients with Lumbar Disc Herniation
Source: MDPI journal article supplement (doi:10.3390/healthcare11182598), 2023-09-21
Supplement: s1 [file s1]

**Table S11.** Important factors in treatment. (For patients diagnosed on MRI)

|                                | Pain vs disability |             | Rapid vs stable treatment effect |               | Treatment effect vs safety |             |
|--------------------------------|--------------------|-------------|----------------------------------|---------------|----------------------------|-------------|
|                                | pain               | disability  | Rapid effects                    | Stable effect | Treatment effect           | safety      |
|                                | N (%)              | N (%)       | N (%)                            | N (%)         | N (%)                      | N (%)       |
| <b>Total (N=317)</b>           | 146 (46.1%)        | 171 (53.9%) | 59 (18.6%)                       | 258 (81.4%)   | 137 (43.2%)                | 180 (56.8%) |
| <b>Sex</b>                     |                    |             |                                  |               |                            |             |
| Male (n=172)                   | 70 (40.7%)         | 102 (59.3%) | 29 (16.9%)                       | 143 (83.1%)   | 81 (47.1%)                 | 91 (52.9%)  |
| Female (n=145)                 | 76 (52.4%)         | 69 (47.6%)  | 30 (20.7%)                       | 115 (79.3%)   | 56 (38.6%)                 | 89 (61.4%)  |
| <i>P</i> -value                |                    | 0.049       |                                  | 0.467         |                            | 0.161       |
| <b>Age group, years</b>        |                    |             |                                  |               |                            |             |
| 19-29 (n=57)                   | 29 (50.9%)         | 28 (49.1%)  | 10 (17.5%)                       | 47 (82.5%)    | 24 (42.1%)                 | 33 (57.9%)  |
| 30-39 (n=59)                   | 24 (40.7%)         | 35 (59.3%)  | 10 (16.9%)                       | 49 (83.1%)    | 24 (40.7%)                 | 35 (59.3%)  |
| 40-49 (n=68)                   | 31 (45.6%)         | 37 (54.4%)  | 16 (23.5%)                       | 52 (76.5%)    | 26 (38.2%)                 | 42 (61.8%)  |
| 50-59 (n=70)                   | 28 (40.0%)         | 42 (60.0%)  | 12 (17.1%)                       | 58 (82.9%)    | 36 (51.4%)                 | 34 (48.6%)  |
| ≥60 (n=63)                     | 34 (54.0%)         | 29 (46.0%)  | 11 (17.5%)                       | 52 (82.5%)    | 27 (42.9%)                 | 36 (57.1%)  |
| <i>P</i> -value                |                    | 0.427       |                                  | 0.846         |                            | 0.592       |
| <b>Symptom onset time</b>      |                    |             |                                  |               |                            |             |
| <4 weeks (n=31)                | 16 (51.6%)         | 15 (48.4%)  | 5 (16.1%)                        | 26 (83.9%)    | 20 (64.5%)                 | 11 (35.5%)  |
| ≥4 weeks to <12 weeks (n=66)   | 33 (50.0%)         | 33 (50.0%)  | 18 (27.3%)                       | 48 (72.7%)    | 28 (42.4%)                 | 38 (57.6%)  |
| ≥12 weeks to <12 months (n=58) | 18 (31.0%)         | 40 (69.0%)  | 14 (24.1%)                       | 44 (75.9%)    | 25 (43.1%)                 | 33 (56.9%)  |
| ≥12 months (n=162)             | 79 (48.8%)         | 83 (51.2%)  | 22 (13.6%)                       | 140 (86.4%)   | 64 (39.5%)                 | 98 (60.5%)  |
| <i>P</i> -value                |                    | 0.009       |                                  | 0.064         |                            | 0.084       |
| <b>Severity</b>                |                    |             |                                  |               |                            |             |
| Severe (n=113)                 | 48 (42.5%)         | 65 (57.5%)  | 20 (17.7%)                       | 93 (82.3%)    | 55 (48.7%)                 | 58 (51.3%)  |
| Moderate to severe (n=105)     | 53 (50.5%)         | 52 (49.5%)  | 21 (20.0%)                       | 84 (80.0%)    | 39 (37.1%)                 | 66 (62.9%)  |
| Mild to moderate (n=99)        | 45 (45.5%)         | 54 (54.5%)  | 18 (18.2%)                       | 81 (81.8%)    | 43 (43.4%)                 | 56 (56.6%)  |
| <i>P</i> -value                |                    | 0.491       |                                  | 0.901         |                            | 0.229       |
