# Supplementary material for: Are Primary Outcomes Really Primary? An Exploratory Cross-Sectional Nationwide Web-Based Survey Study for Outcomes Reflecting Real Symptoms and Needs of Patients with Lumbar Disc Herniation
Source: Healthcare (Basel). 2023 Sep 21;11(18):2598. doi: 10.3390/healthcare11182598 (PMC10531434; doi:10.3390/healthcare11182598)
Supplement: Supplementary file 1 [file healthcare-11-02598-s001.zip]

Archive with 15 entries (15 files):
- S10_Table.pdf
- S11_Table.pdf
- S12_Table.pdf
- S13_Table.pdf
- S1_File.pdf
- S1_Table.pdf
- S2_Table.pdf
- S3_Table.pdf
- S4_Table.pdf
- S5_Table.pdf
- S6_Table.pdf
- S7_Table.pdf
- S8_Table.pdf
- S9_Table.pdf
- Table S14.pdf
